# Supplementary material for: Nitrogen-enriched polydopamine analogue-derived defect-rich porous carbon as a bifunctional metal-free electrocatalyst for highly efficient overall water splitting
Source: Royal Society of Chemistry journal article supplement (doi:10.1039/c7ta03999a), 2017-01-01
Supplement: c7ta03999a1.pdf [file c7ta03999a1.pdf]

## Supplementary Information

# **Nitrogen-Enriched Polydopamine Analogue-Derived Defect-Rich Porous Carbon as Bifunctional Metal-Free Electrocatalysts for Highly Efficient Overall Water Splitting**

Zheyue Zhang,<sup>a</sup> Zhengran Yi,<sup>a</sup> Juan Wang,<sup>a</sup> Xin Tian,<sup>a</sup> Pei Xu,<sup>a</sup> Gaoquan Shi,<sup>b</sup> and Shuai Wang<sup>a\*</sup>

<sup>a</sup>Key laboratory of Material Chemistry for Energy Conversion and Storage, Ministry of Education, School of Chemistry and Chemical Engineering, Huazhong University of Science and Technology, Wuhan, 430074, China

<sup>b</sup>Department of Chemistry, Tsinghua University, Beijing, 100084, China

Corresponding author: \*E-mail: chmsamuel@mail.hust.edu.cn (S. Wang).

## 1. Supplementary Figures

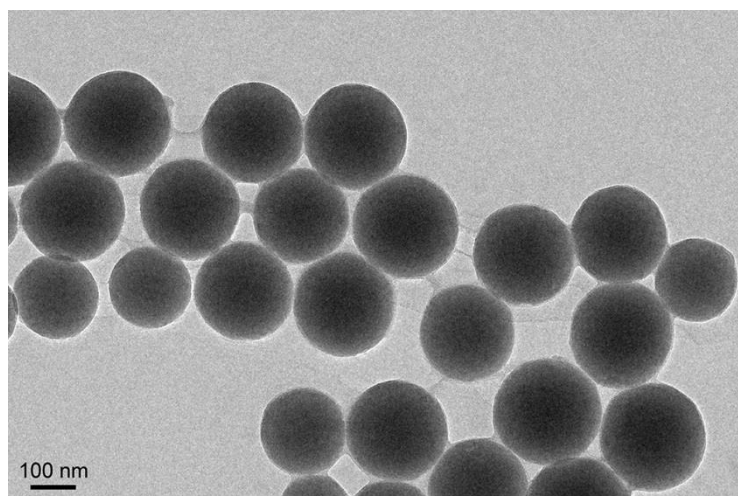

**Figure S1.** TEM image of spherical SiO<sub>2</sub> sample.

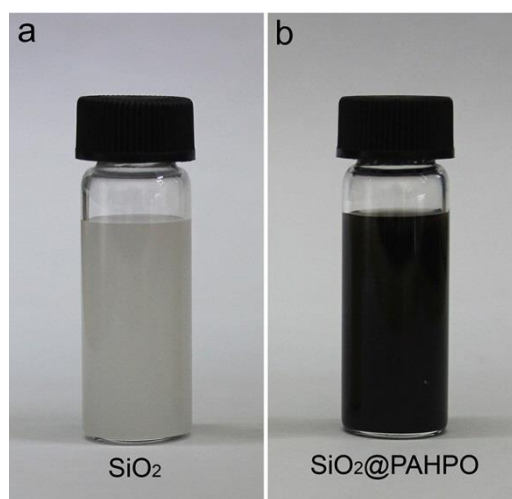

**Figure S2.** Photographs of (a) SiO<sub>2</sub> dispersion and (b) Polymerized dispersion.

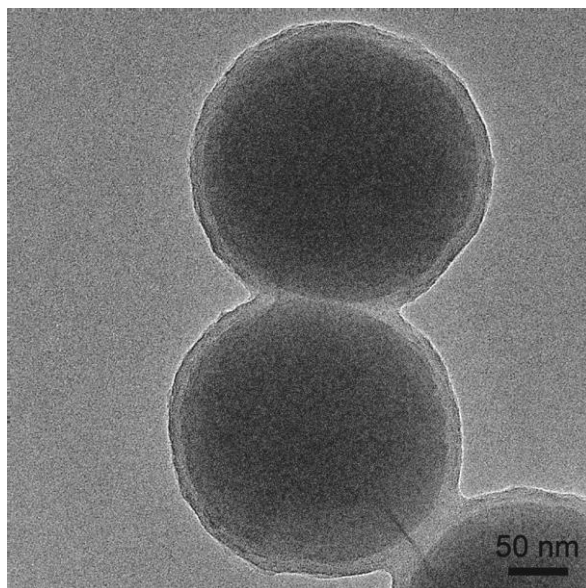

**Figure S3.** TEM image of SiO<sub>2</sub>@PAHPO.

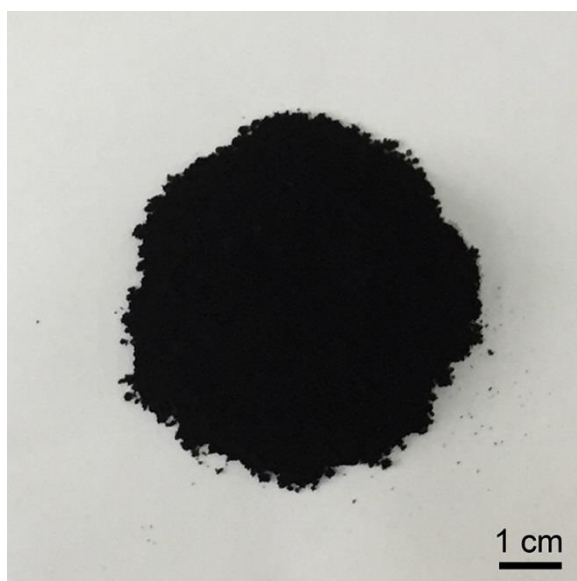

**Figure S4.** A photograph of DRPC powder.

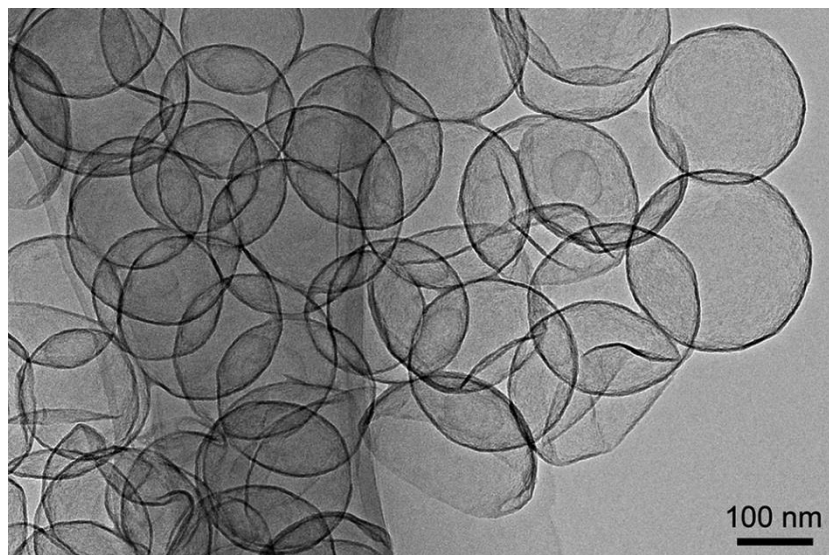

**Figure S5.** TEM image of PC.

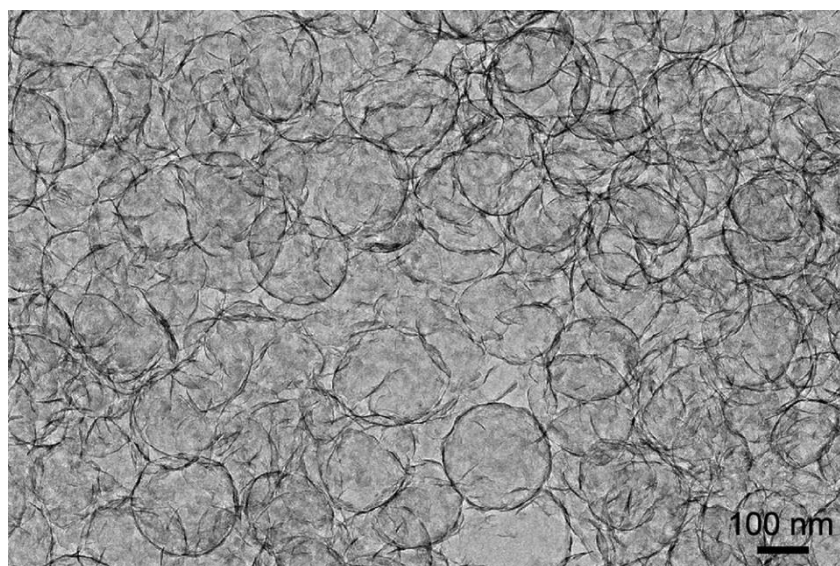

**Figure S6.** TEM image of DRPC.

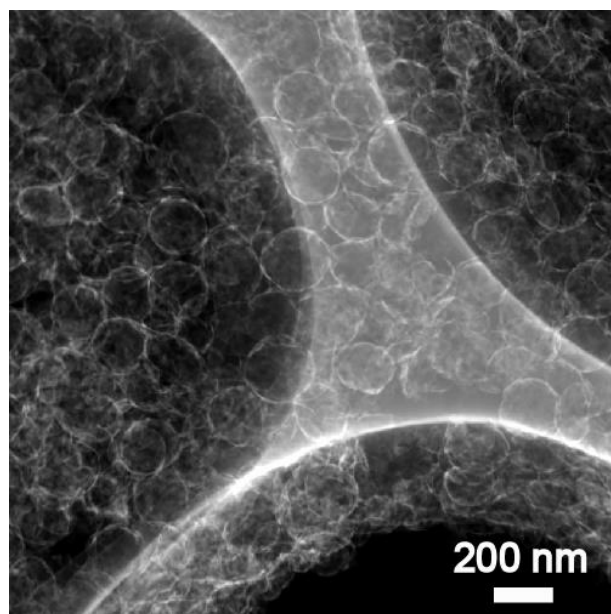

**Figure S7.** STEM image of DRPC.

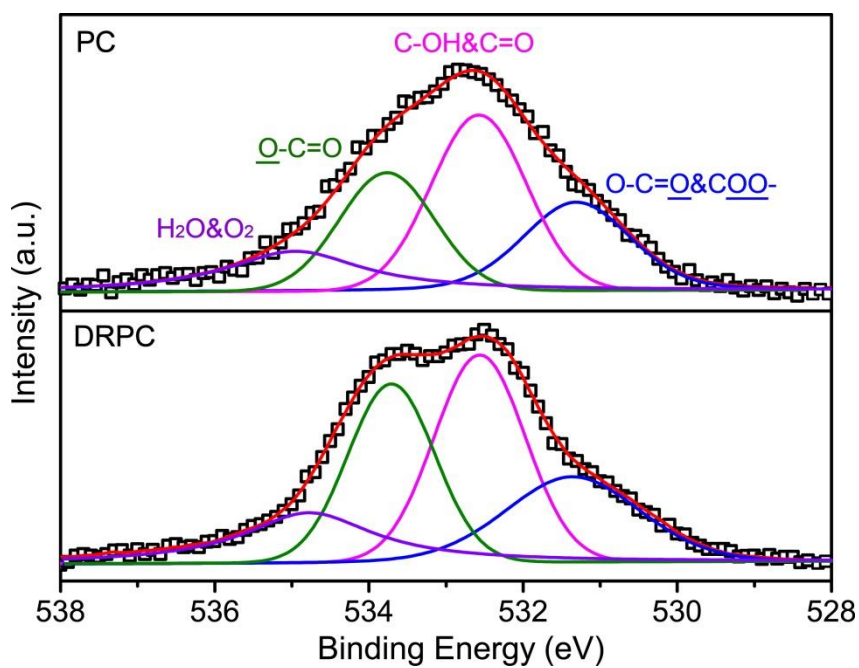

**Figure S8.** High-resolution XPS spectra of the O 1s core level for PC and DRPC.

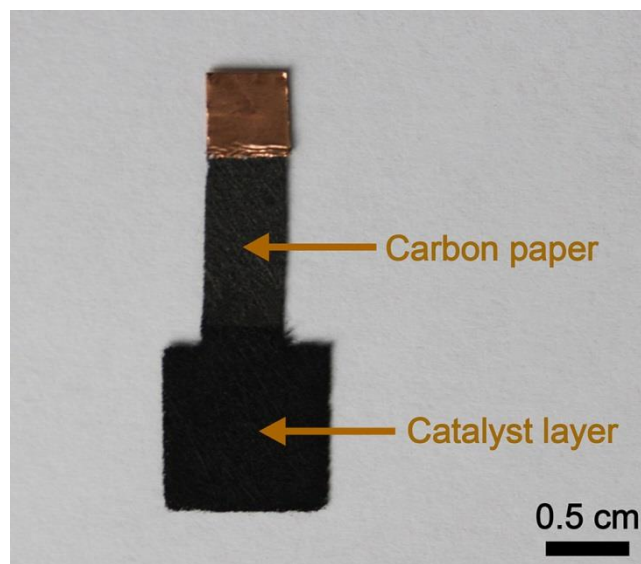

**Figure S9.** A photograph of DRPC catalyst on carbon fiber paper.

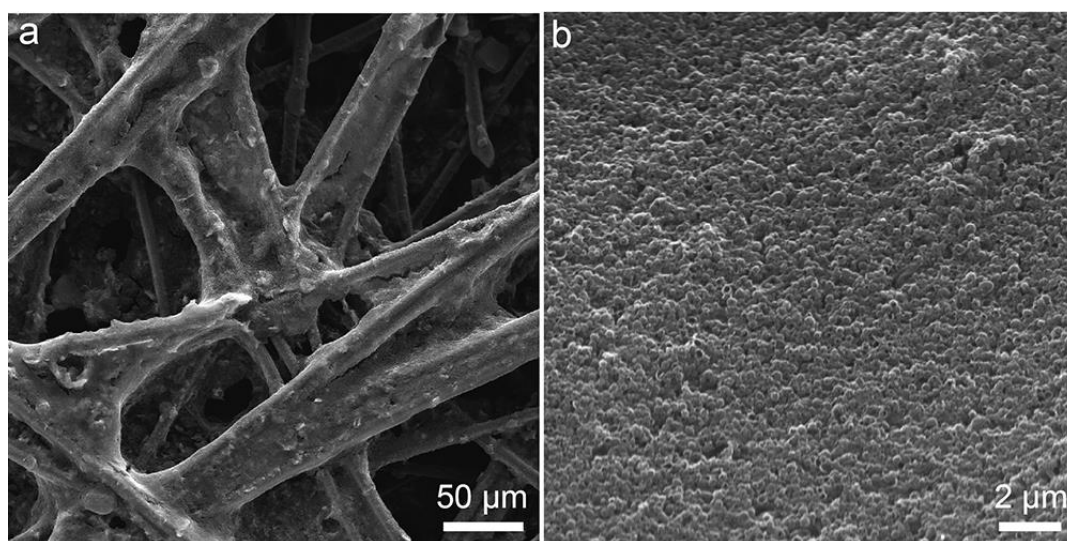

**Figure S10.** SEM images of the DRPC catalyst on carbon fiber paper.

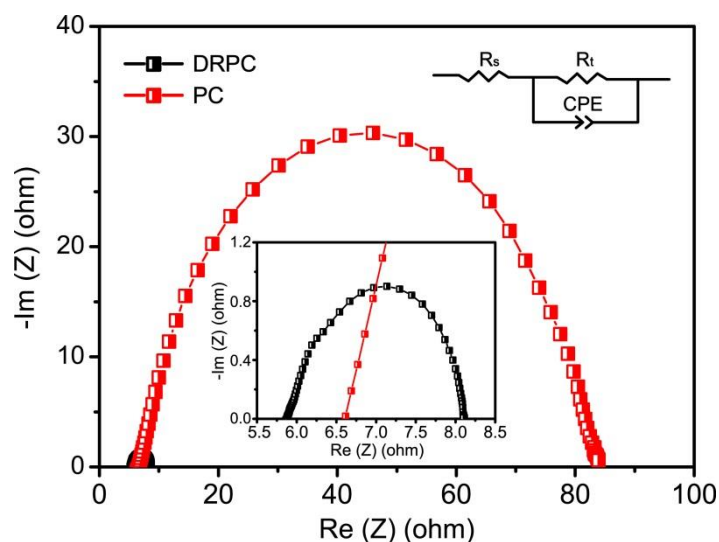

**Figure S11.** EIS plots of the catalysts. The inset is the enlarged version of the DRPC and PC catalysts.

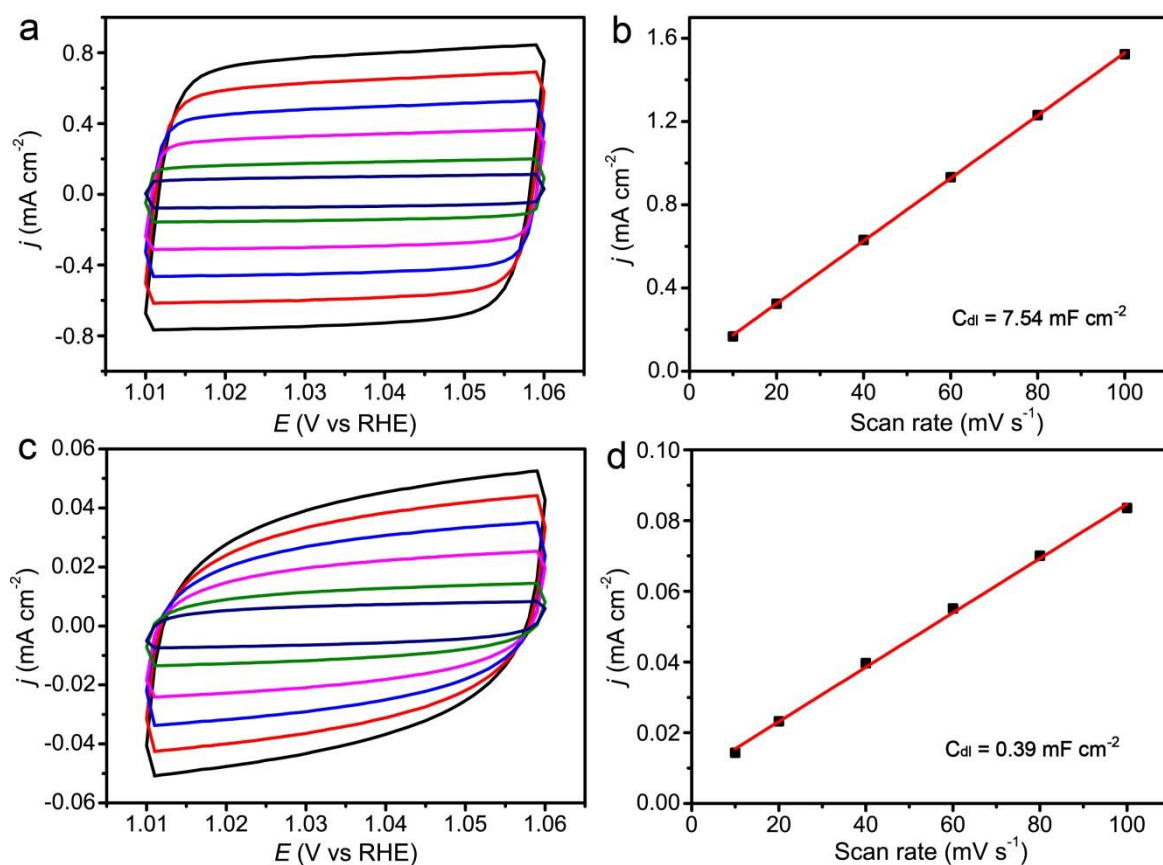

**Figure S12.** CV curves of (a) DRPC and (c) PC with various scan rates (10, 20, 40, 60, 80 and 100 mV s<sup>-1</sup>). The charging current density differences plotted against scan rates for (b) DRPC and (d) PC. The calculated  $C_{dl}$  values are shown in insets.

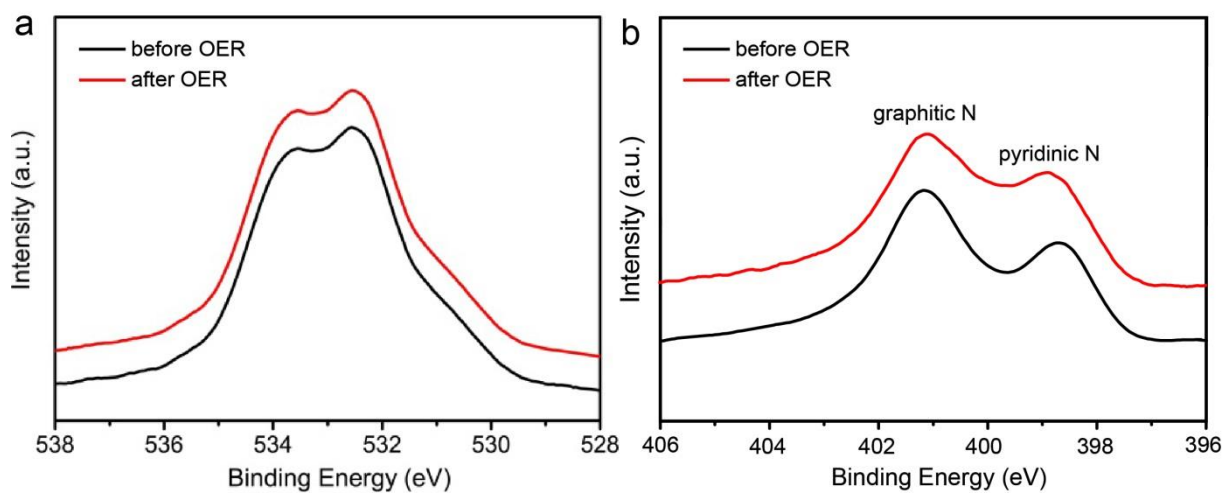

**Figure S13.** (a) The O 1s and (b) N 1s spectra of DRPC catalysts before and after OER tests.

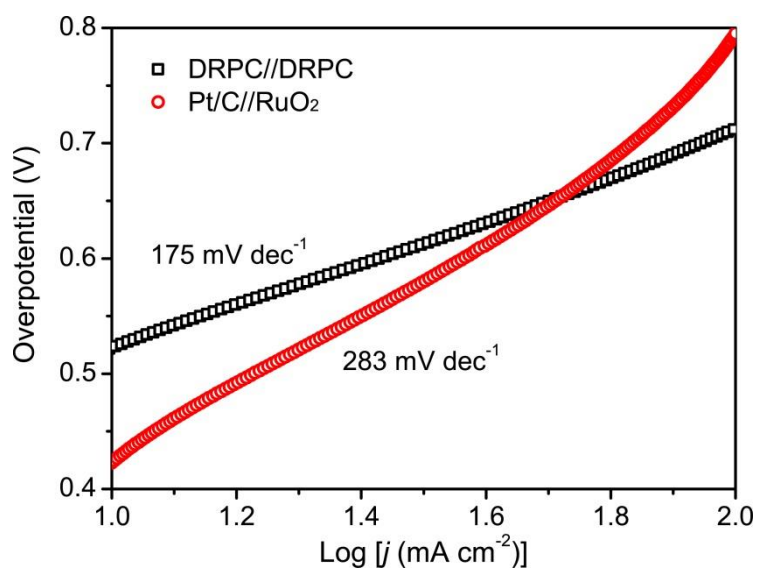

**Figure S14.** Tafel plots of the DRPC//DRPC and Pt/C//RuO<sub>2</sub> electrolyzers. The calculated Tafel slope values are shown in insets.



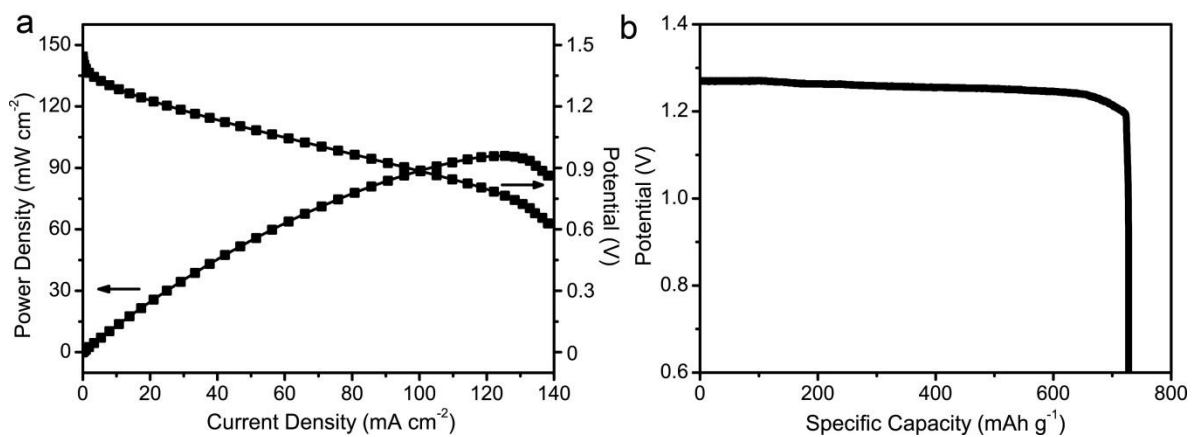

**Figure S15.** (a) Polarization and power density curves of primary Zn-air battery using DRPC as the ORR electrocatalyst. (b) Long-time galvanostatic discharge curves of primary Zn-air battery with DRPC as cathode catalyst until complete consumption of Zn anode.

## 2. Supplementary tables

**Table S1.** HER parameters of the typical comparable samples.

| Catalyst                          | Catalyst loading (mg cm <sup>-2</sup> ) | $\eta_{10}$ (mV) | Tafel slope (mV dec <sup>-1</sup> ) | Electrolyte                          | Ref.                                  |
|-----------------------------------|-----------------------------------------|------------------|-------------------------------------|--------------------------------------|---------------------------------------|
| <b>DRPC</b>                       | <b>0.16</b>                             | <b>217</b>       | <b>98</b>                           | <b>1.0 M KOH</b>                     | <b>This work</b>                      |
| C <sub>3</sub> N <sub>4</sub> @NG | 0.10                                    | ~240             | 51                                  | 0.5 M H <sub>2</sub> SO <sub>4</sub> | Nat. Commun. 2014, 5, 3783            |
| N,S-G                             | 0.20                                    | ~274             | /                                   | 1.0 M KOH                            | Adv. Mater. 2017, 29, 1604942         |
| N,P-G                             | 0.20                                    | ~422             | 91                                  | 0.5 M H <sub>2</sub> SO <sub>4</sub> | ACS Nano 2014, 8, 5290                |
| N,O,P-G                           | 0.10                                    | ~446             | 154                                 | 1.0 M KOH                            | Energy Environ. Sci. 2016, 9, 1210    |
| N,S-CNT                           | 0.20                                    | ~450             | 133                                 | 1.0 M KOH                            | Adv. Energy Mater. 2017, 7, 1602068   |
| N-G                               | 0.20                                    | ~488             | /                                   | 0.5 M H <sub>2</sub> SO <sub>4</sub> | ACS Nano 2014, 8, 5290                |
| S-G                               | 0.20                                    | ~550             | /                                   | 0.5 M H <sub>2</sub> SO <sub>4</sub> | ACS Nano 2014, 8, 5290                |
| Amorphous Co <sub>2</sub> B       | 0.21                                    | ~328             | 92                                  | 1.0 M KOH                            | Adv. Energy Mater. 2016, 6, 1502313   |
| Co-NRCNT                          | 0.28                                    | ~370             | /                                   | 1.0 M KOH                            | Angew. Chem., Int. Ed. 2014, 53, 4372 |
| Co-NG                             | 0.28                                    | ~270             | /                                   | 1.0 M NaOH                           | Nat. Commun. 2015, 6, 8668            |
| CoO <sub>x</sub> @CN              | 0.12                                    | ~232             | /                                   | 1.0 M KOH                            | J. Am. Chem. Soc. 2015, 137, 2688     |

$\eta_{10}$ : current density @ 10 mA cm<sup>-2</sup>

**Table S2.** OER parameters of the typical comparable samples.

| Catalyst                    | Catalyst loading (mg cm <sup>-2</sup> ) | $\eta_{10}$ (mV) | Tafel slope (mV dec <sup>-1</sup> ) | Electrolyte      | Ref.                                |
|-----------------------------|-----------------------------------------|------------------|-------------------------------------|------------------|-------------------------------------|
| <b>DRPC</b>                 | <b>0.16</b>                             | <b>360</b>       | <b>57</b>                           | <b>1.0 M KOH</b> | <b>This work</b>                    |
| B-CNTs                      | 0.04                                    | ~600             | 51                                  | 1.0 M KOH        | Electrochim. Acta 2014, 143, 291    |
| N,S-G                       | 0.20                                    | ~450             | /                                   | 1.0 M KOH        | Adv. Mater. 2017, 29, 1604942.      |
| N,O,P-G                     | 0.10                                    | ~400             | 84                                  | 1.0 M KOH        | Energy Environ. Sci. 2016, 9, 1210  |
| N-PCC                       | 8.00                                    | ~360             | 98                                  | 1.0 M KOH        | Energy Environ. Sci. 2016, 9, 3411  |
| N,S-GF                      | /                                       | ~355             | 78                                  | 1.0 M KOH        | Adv. Energy Mater. 2016, 6, 1501492 |
| N,S-CNT                     | 0.20                                    | ~360             | 56                                  | 1.0 M KOH        | Adv. Energy Mater. 2017, 7, 1602068 |
| RuO <sub>2</sub>            | 0.16                                    | ~385             | 98                                  | 1.0 M KOH        | This work                           |
| Amorphous Co <sub>2</sub> B | 0.21                                    | ~380             | 45                                  | 1.0 M KOH        | Adv. Energy Mater. 2016, 6, 1502313 |
| Ni-NG                       | /                                       | ~370             | 190                                 | 1.0 M KOH        | Energy Environ. Sci., 2013, 6, 3693 |
| CoO-NG                      | 0.70                                    | ~340             | 71                                  | 1.0 M KOH        | Energy Environ. Sci. 2014, 7, 609   |

$\eta_{10}$ : current density @ 10 mA cm<sup>-2</sup>

**Table S3.** Atomic content of PC and DRPC calculated from the XPS survey spectra.

| Sample | C       | O       | N      |
|--------|---------|---------|--------|
| PC     | 90.29 % | 6.69 %  | 3.02 % |
| DRPC   | 80.29 % | 10.35 % | 9.36 % |

**Table S4.** The  $sp^2$ ,  $sp^3$  carbon, C-O&C-N, C=O relative content and  $sp^2/sp^3$  in the samples of PC and DRPC.

| C species | $sp^2$ | $sp^3$ | C-O&C-N | C=O   | $sp^2/sp^3$ |
|-----------|--------|--------|---------|-------|-------------|
| PC        | 57.6 % | 21.7 % | 13.5 %  | 7.2 % | 2.65        |
| DRPC      | 51.3 % | 23.9 % | 15.7 %  | 9.1 % | 2.14        |

**Table S5.** The percent composition for C-O, C=O and oxygen or absorbed water in the samples of PC and DRPC.

| O species | COO-&O-C=O | C-OH&C=O | O-C=O  | O <sub>2</sub> &H <sub>2</sub> O |
|-----------|------------|----------|--------|----------------------------------|
| PC        | 1.48 %     | 2.62 %   | 1.72 % | 0.87 %                           |
| DRPC      | 1.98 %     | 3.92 %   | 2.89 % | 1.56 %                           |

### 3. Supplementary video

**Video S1.** The evolution of H<sub>2</sub> and O<sub>2</sub> in the DRPC catalyst couple-based alkaline water electrolyzer (20 mA cm<sup>-2</sup> overall water splitting current).
